# Supplementary material
Source: PubMed Central journal article supplement (PMC4861240)
Supplement: NIHMS408601-supplement-1.pdf [file NIHMS408601-supplement-1.pdf]

| Symbol   | GenBank     | Description                                        | Illumina Fold Increase |      |      | SAGE Counts |     |
|----------|-------------|----------------------------------------------------|------------------------|------|------|-------------|-----|
|          |             |                                                    | 36 h                   | 48 h | 72 h | con         | 72h |
| MYOD1    | NM_002478.3 | myogenic factor 3                                  | 4.2                    | 4.6  | 3.6  | 35          | 143 |
| MYOG     | NM_002479.2 | myogenin (myogenic factor 4)                       | 34                     | 35.2 | 28.9 | 0           | 24  |
| DES      | NM_001927.2 | desmin (DES)                                       | 7                      | 8.4  | 10.7 | 0           | 51  |
| MEF2C    | NM_002397.2 | MADS box transcription enhancer factor 2, C        | 9.1                    | 10.4 | 9.4  | 0           | 6   |
| SMPX     | NM_014332.1 | small muscle protein                               | 23                     | 28.9 | 19.3 | 0           | 12  |
| RYR1     | NM_000540.1 | ryanodine receptor 1 (skeletal)                    | 2.3                    | 3.2  | 2.7  | 3           | 2   |
| ACTC     | NM_005159.2 | actin, alpha, cardiac muscle                       | 47.4                   | 55.6 | 52.8 | 0           | 18  |
| MYH3     | NM_002470.1 | myosin, heavy polypeptide 3, skeletal muscle       | 71.8                   | 96.1 | 118  | 0           | 2   |
| TAGLN    | NM_003186.2 | transgelin                                         | 5.8                    | 5    | 2.4  | 0           | 0   |
| HAK      | NM_052947.1 | heart alpha-kinase                                 | 8.9                    | 11.1 | 11   | 0           | 0   |
| CDH15    | NM_004933.2 | cadherin 15, M-cadherin (myotubule).               | 14                     | 14.9 | 11.7 | 0           | 37  |
| ENO3     | NM_053013.1 | enolase 3, (beta, muscle)                          | 3                      | 4.2  | 4.9  | 3           | 26  |
| MYL4     | NM_002476.2 | myosin, light polypeptide 4                        | 14.3                   | 17.5 | 10.4 | 3           | 59  |
| MYL1     | NM_079422.1 | myosin, light polypeptide 1, skeletal, fast        | 19                     | 37.6 | 33   | 0           | 26  |
| MLC1SA   | NM_002475.2 | myosin light chain 1 slow                          | 3.6                    | 4    | 3.2  | 6           | 55  |
| KIFC3    | NM_005550.2 | kinesin family member C3                           | 3.6                    | 4.6  | 3.4  | 0           | 2   |
| MYO18B   | NM_032608.4 | myosin XVIIIIB                                     | 4.3                    | 6.5  | 7.5  | 3           | 2   |
| HUMMLC2B | NM_013292.2 | myosin light chain 2                               | 33.6                   | 46.4 | 38.9 | 0           | 232 |
| MRAS     | NM_012219.2 | muscle RAS oncogene homolog                        | 2.9                    | 2.4  | 1.7  | 0           | 0   |
| TPM1     | NM_000366.4 | tropomyosin 1 (alpha)                              | 7.6                    | 10.6 | 10.2 | 3           | 4   |
| TNNT1    | NM_003283.3 | troponin T1, skeletal, slow                        | 6.3                    | 8.4  | 8.2  | 9           | 86  |
| TNNC2    | NM_003279.2 | troponin C2, fast                                  | 31.4                   | 46.4 | 63   | 0           | 96  |
| ID2      | NM_002166.4 | inhibitor of DNA binding 2, dominant negative bHLH | 3.3                    | 3.1  | 2.1  | 0           | 4   |
| CHRN1    | NM_000747.2 | cholinergic receptor, nicotinic, (muscle)          | 2.3                    | 1.9  | 1.7  | 0           | 2   |
| MYH2     | NM_017534.2 | myosin, heavy polypeptide 2, skeletal muscle       | 4.2                    | 6.7  | 3.9  | 0           | 289 |
| KBTBD10  | NM_006063.2 | kelch repeat and BTB domain containing 10          | 18.3                   | 19.2 | 23.6 | 0           | 117 |
| CMYA1    | NM_194293.2 | cardiomyopathy associated 1                        | 2.4                    | 2.4  | 1.9  | 0           | 2   |
| CMYA4    | NM_173167.1 | cardiomyopathy associated 4                        | 6.1                    | 11.5 | 9.8  | 0           | 2   |
| TEAD4    | NM_003213.1 | TEA domain family member 4                         | 2.5                    | 2.4  | 2.3  | 0           | 6   |
| APOBEC2  | NM_006789.2 | apolipoprotein B mRNA editing enzyme               | 11.9                   | 14.1 | 11.3 | 0           | 14  |
| ACTA2    | NM_001613.1 | actin, alpha 2, smooth muscle                      | 18.8                   | 14.2 | 4.2  | 0           | 2   |
| MYL5     | NM_002477.1 | myosin, light polypeptide 5, regulatory            | 9.1                    | 10.8 | 10.5 | 0           | 16  |
| MYOM1    | NM_003803.1 | myomesin 1 (skelemin) 185kDa                       | 2.2                    | 2.5  | 4.1  | 0           | 4   |
| TNNC1    | NM_003280.1 | troponin C, slow                                   | 8.1                    | 8    | 8.2  | 3           | 28  |
| TNNI2    | NM_003282.1 | troponin I, skeletal, fast                         | 3.4                    | 3.5  | 3.9  | 0           | 2   |
| TNNT2    | NM_000364.1 | troponin T2, cardiac                               | 11.6                   | 9.9  | 5.8  | 0           | 4   |
| TTN      | NM_133379.1 | titin, transcript variant novex-3                  | 7.3                    | 6.2  | 3.4  | 3           | 24  |
| TTID     | NM_006790.1 | titin immunoglobulin domain protein                | 9.2                    | 10.1 | 12.3 | 0           | 6   |
| KBTBD5   | NM_152393.2 | kelch repeat and BTB domain containing 5           | 11.2                   | 11.4 | 9.6  | 0           | 2   |
| MYBPH    | NM_004997.1 | myosin binding protein H                           | 55.1                   | 50.6 | 36.1 | 0           | 4   |
| MB       | NM_005368.1 | myoglobin (MB), transcript variant 1               | 8                      | 24.7 | 36.4 | 0           | 10  |
| TNNT3    | NM_006757.1 | troponin T3, skeletal, fast                        | 35.8                   | 56.7 | 88   | 0           | 26  |
| CDKN1A   | NM_000389.2 | cyclin-dependent kinase inhibitor 1A (p21, Cip1)   | 30.4                   | 28.3 | 19.9 | 0           | 24  |
| CDKN1C   | NM_000076.1 | cyclin-dependent kinase inhibitor 1C (p57, Kip2)   | 11.3                   | 12.5 | 8.6  | 0           | 0   |
| GADD45G  | NM_006705.2 | growth arrest and DNA-damage-inducible, gamma      | 2.8                    | 3    | 2.3  | 0           | 2   |
| CASP9    | NM_032996.1 | caspase 9, apoptosis-related cysteine protease     | 4.3                    | 3.6  | 2.7  | 0           | 6   |
| TUBB3    | NM_006086.1 | tubulin, beta, 3                                   | 4.6                    | 7.3  | 6.5  | 0           | 4   |
| NEF3     | NM_005382.1 | neurofilament 3 (150kDa medium)                    | 3.2                    | 4.4  | 3.6  | 0           | 2   |
| NCAM1    | NM_181351.1 | neural cell adhesion molecule 1                    | 2.6                    | 2.1  | 2.1  | 0           | 6   |
| NAV1     | NM_020443.2 | neuron navigator 1                                 | 2.3                    | 1.9  | 1.9  | 3           | 6   |
| MAP1A    | NM_002373.4 | microtubule-associated protein 1A                  | 4.3                    | 4.8  | 3.2  | 0           | 2   |
| DCX      | NM_178153.1 | doublecortex, X-linked (doublecortin), v. 3        | 4.6                    | 5.3  | 5.6  | 0           | 0   |
| DCAMK1   | NM_004734.2 | doublecortin and CaM kinase-like 1                 | 5.4                    | 5.2  | 3.5  | 0           | 12  |
| LRRN1    | NM_020873.3 | leucine rich repeat neuronal 1                     | 13.7                   | 17   | 14.2 | 0           | 14  |
| CDK5R1   | NM_003885.2 | cyclin-dependent kinase 5, reg. subunit 1 (p35)    | 3.1                    | 2.9  | 2.1  | 3           | 2   |
| PRPH     | NM_006262.2 | peripherin (PRPH)                                  | 2.4                    | 2.3  | 2.5  | 0           | 0   |
| GAPDH    | NM_002046   | glyceraldehyde-3-phosphate dehydrogenase           | 0.96                   | 0.94 | 0.9  | 456         | 359 |
| ACTB     | NM_001101   | actin, beta                                        | 1.06                   | 1.12 | 1.02 | 322         | 182 |
