# Supplementary material
Source: PubMed Central journal article supplement (PMC4861240)
Supplement: NIHMS408601-supplement-7.pdf [file NIHMS408601-supplement-7.pdf]

**A**

**MMB #1**

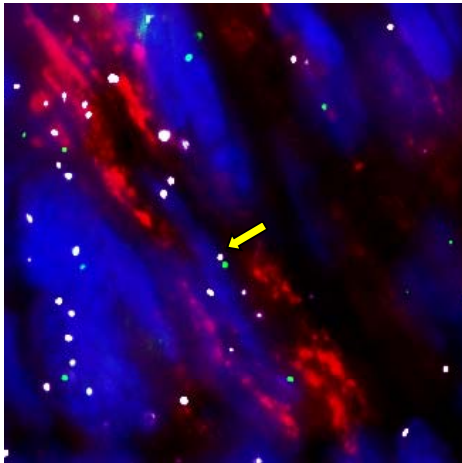

OTX2-Green, MYC-White  
Des-IF-Red, DAPI-Blue

**B**

**MMB #2**

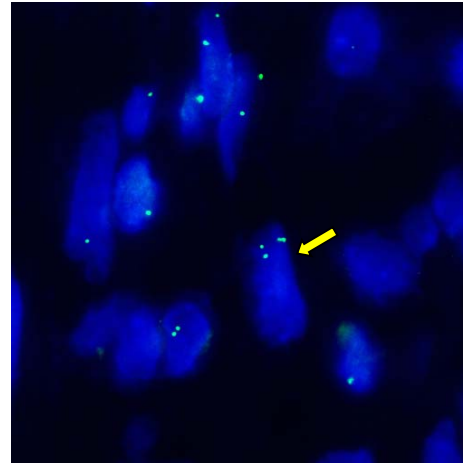

OTX2-Green, DAPI-Blue

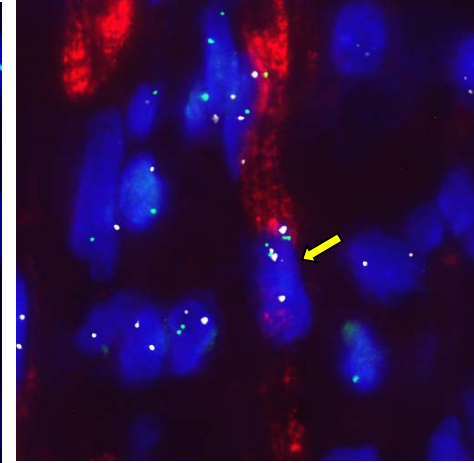

OTX2-Green, MYC-White  
Des-IF-Red, DAPI-Blue

**A**

GM

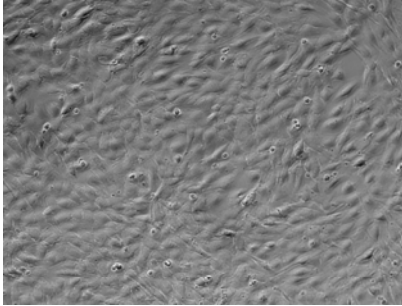

**B**

DM no Dox

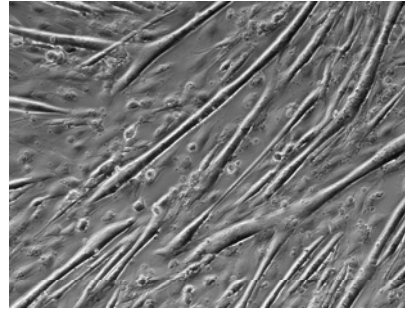

0.1  $\mu\text{g/ml}$  Dox

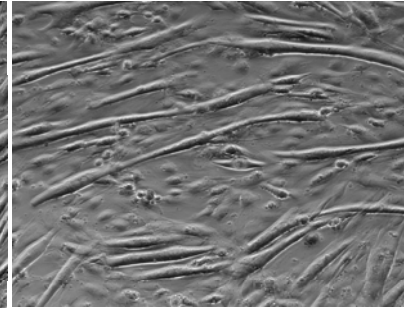

0.5  $\mu\text{g/ml}$  Dox

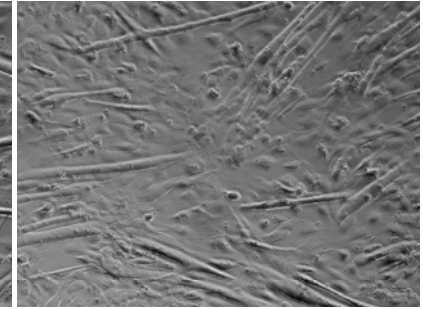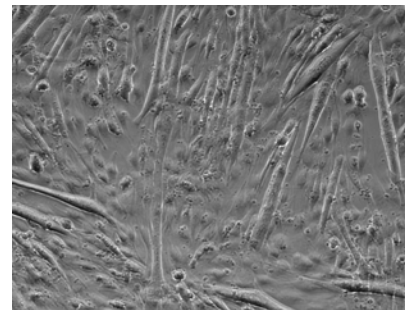

1  $\mu\text{g/ml}$  Dox

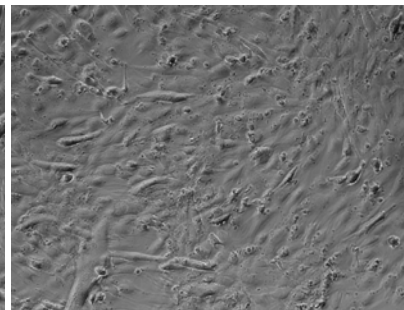

2  $\mu\text{g/ml}$  Dox

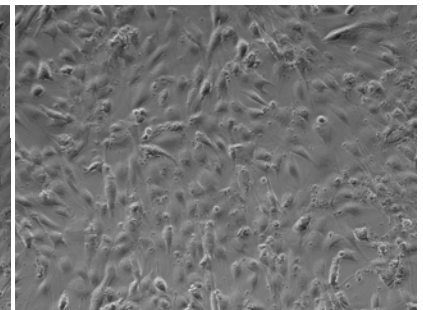

5  $\mu\text{g/ml}$  Dox
